# Supplementary material for: Detection of Foodborne Pathogens Using Proteomics and Metabolomics-Based Approaches
Source: PubMed Central journal article supplement (PMC6305589; doi:10.3389/fmicb.2018.03132), 2018-12-18
Supplement: Data_Sheet_1.pdf [file Data_Sheet_1.pdf]

## **Detection of foodborne pathogens using a whole-cell enrichment proteomics and metabolomics-based approach**

Snehal R. Jadhav <sup>1#</sup>, Rohan M. Shah <sup>1</sup>, Avinash V. Karpe <sup>1,2</sup>, Paul D. Morrison <sup>3</sup>,  
Konstantinos Kouremenos <sup>4</sup>, David J. Beale <sup>2</sup> and Enzo A. Palombo <sup>1,\*</sup>

<sup>1</sup> Department of Chemistry and Biotechnology, Swinburne University of Technology, Melbourne, Australia

<sup>2</sup> Land and Water, Commonwealth Scientific and Industrial Research Organisation (CSIRO), Brisbane, Australia

<sup>3</sup> Australian Centre for Research on Separation Science, RMIT University, Melbourne, Victoria, Australia

<sup>4</sup> Metabolomics Australia, Bio21 Molecular Science and Biotechnology Institute, The University of Melbourne, Melbourne, Australia

\*Corresponding author email:

[epalombo@swin.edu.au](mailto:epalombo@swin.edu.au) (EAP)

# Current address: Centre for Advanced Sensory Science, School of Exercise and Nutrition Sciences, Deakin University, Melbourne, Australia ([snehal.jadhav@deakin.edu.au](mailto:snehal.jadhav@deakin.edu.au))

## **Supplementary Information**

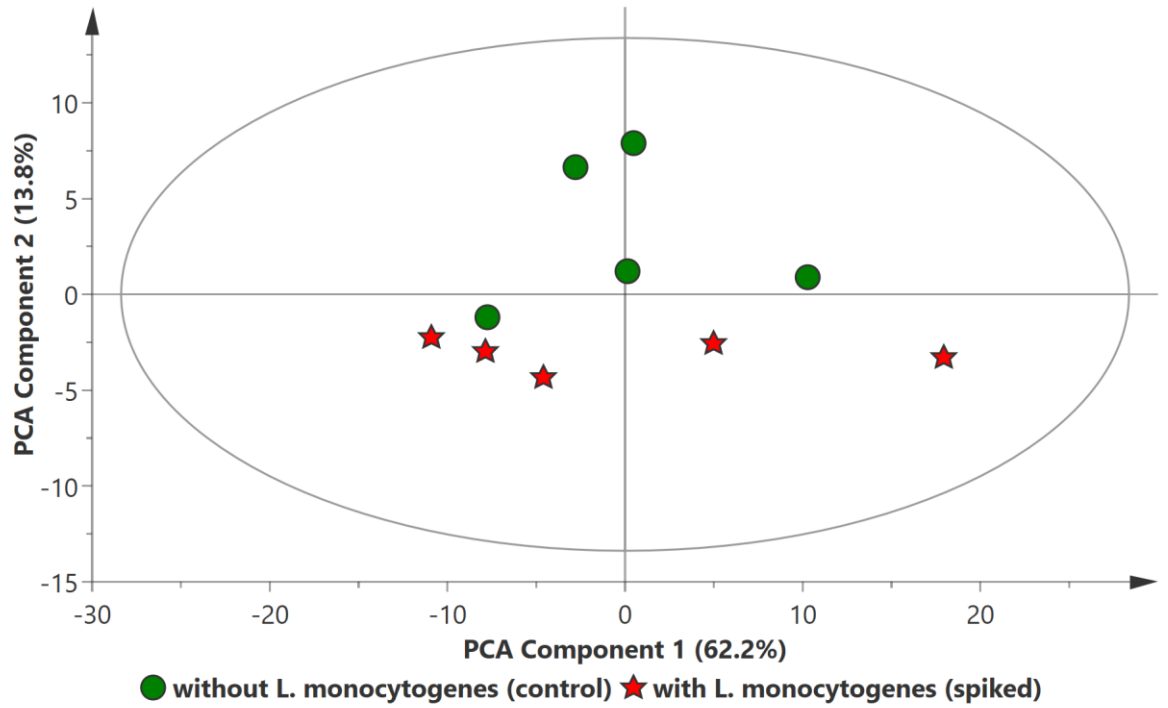

(A)

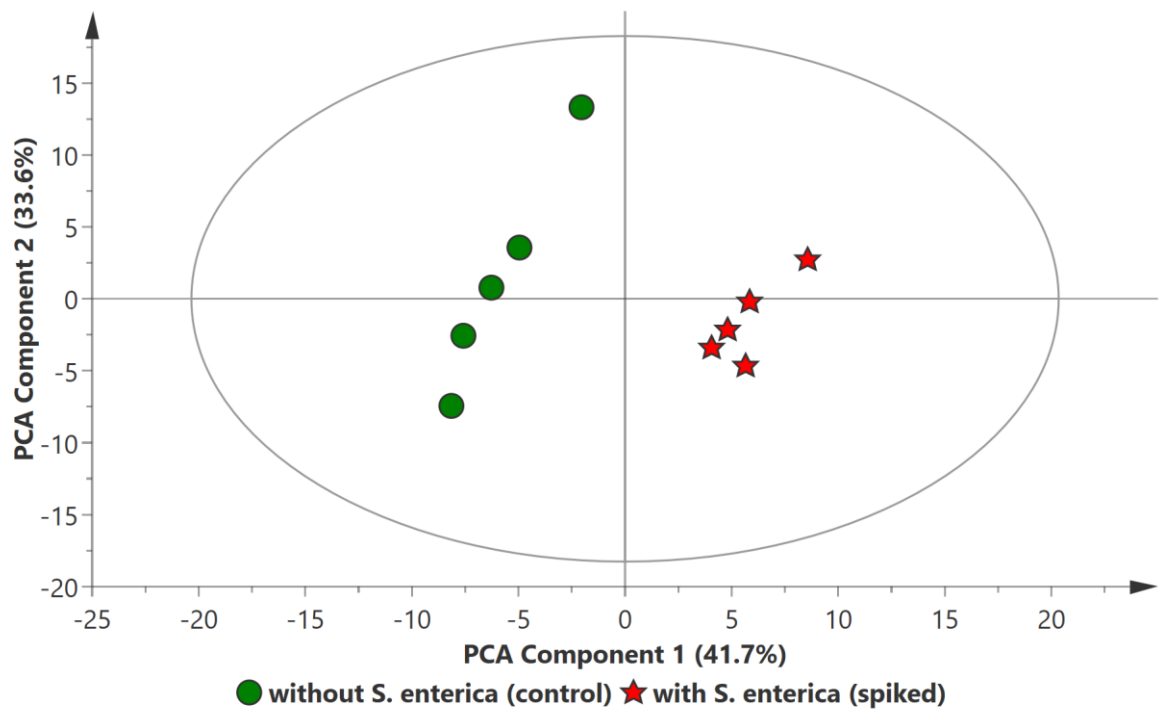

(B)

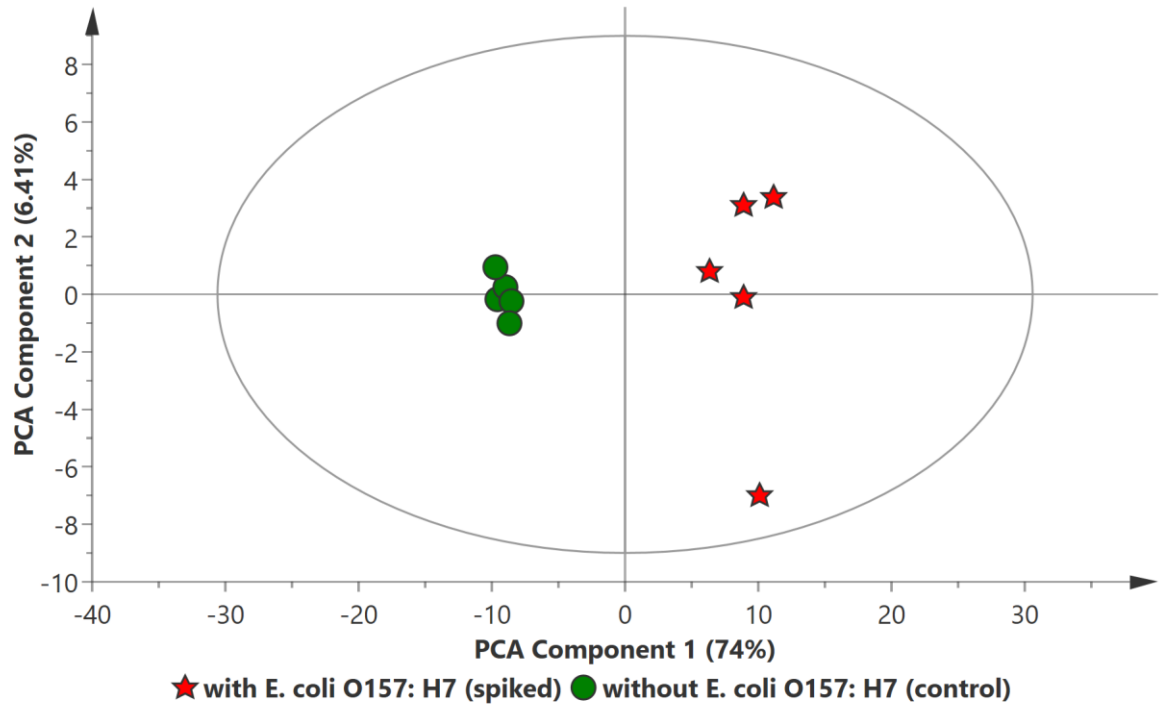

(C)

**Figure S1. PCA scatter plots of (A) *Listeria monocytogenes* ( $R^2X=85\%$  and  $Q^2= 64.7\%$ ), (B) *Salmonella enterica* ( $R^2X=87.7\%$  and  $Q^2= 48.1\%$ ) and (C) *Escherichia coli* O157:H7 ( $R^2X=80.4\%$  and  $Q^2= 63.2\%$ ) enriched in selective media containing the minced beef samples.** Green circles (●) indicate data obtained from control beef samples and red stars (★) indicate data from spiked beef samples after specified period of incubation (For *L. monocytogenes*: 24 h; for *S. enterica*: 18 h and *E. coli* O157:H7: 12 h). The PCA ellipse (solid line) represents the 95% confidence interval.

**Table S1. Identified metabolites in *L. monocytogenes*-spiked beef samples**

| Number | Metabolite                                        | Fold change | P value  |
|--------|---------------------------------------------------|-------------|----------|
| 1      | 2,6-dihydroxybenzoic acid                         | 77.4640     | 5.60E-06 |
| 2      | Guanosine                                         | 15.5800     | 1.13E-05 |
| 3      | 3,4-dihydroxymadelic acid                         | 15.1690     | 5.82E-03 |
| 4      | 2,4,6-Tris(trimethylsiloxy)-3-pyridincarbonitrile | 8.1919      | 1.48E-01 |
| 5      | Adenine                                           | 6.8596      | 6.16E-04 |
| 6      | Fructose                                          | 5.2500      | 1.33E-01 |
| 7      | Inulobiose                                        | 4.2365      | 8.35E-04 |
| 8      | Trehalose                                         | 2.7127      | 1.09E-01 |
| 9      | Acetylenedicarboxylic acid                        | 2.5806      | 1.77E-01 |
| 10     | Gluconic acid                                     | 2.3504      | 3.73E-01 |
| 11     | Dihydrosphingosine-1-phosphate, D-Erythro         | 2.3200      | 2.70E-02 |
| 12     | Xylitol                                           | 1.9308      | 3.52E-01 |
| 13     | Compound_78                                       | 1.8001      | 3.37E-01 |
| 14     | Ribose-5-phosphate                                | 1.6279      | 5.56E-01 |
| 15     | N-acetyl-D-galactosamine                          | 1.2829      | 4.92E-02 |
| 16     | Sophorose                                         | 1.2359      | 2.51E-01 |
| 17     | Maleamic acid                                     | 1.2249      | 3.57E-01 |
| 18     | Hexadecanoic acid                                 | 1.2154      | 4.21E-01 |
| 19     | Fructose-6-phosphate                              | 1.2005      | 4.11E-01 |
| 20     | Glucose-6-phosphate                               | 1.2004      | 4.11E-01 |
| 21     | Tryptophan                                        | 1.1922      | 2.97E-01 |
| 22     | Citric acid                                       | 1.1915      | 6.43E-01 |
| 23     | Octadecanoic acid                                 | 1.1861      | 5.11E-01 |
| 24     | Compound_112                                      | 1.1856      | 6.62E-01 |
| 25     | Pentanoic acid                                    | 1.1855      | 6.98E-01 |
| 26     | Ribitol                                           | 1.1799      | 5.86E-01 |
| 27     | Histidine                                         | 1.1763      | 5.00E-01 |
| 28     | 6-Hydroxymelatonin                                | 1.1746      | 6.72E-01 |
| 29     | 1-phenyl-1-(2-trimethylsilylcyclopentyl)ethanol   | 1.1736      | 6.73E-01 |
| 30     | Ornithine-lactam                                  | 1.1725      | 5.20E-01 |
| 31     | Phosphoric acid                                   | 1.1721      | 8.82E-01 |
| 32     | 2-phenylsulphonyl-2-trimethylsilylpropane         | 1.1451      | 4.99E-01 |
| 33     | Norepinephrine                                    | 1.1201      | 7.30E-01 |
| 34     | 3-[(trimethylsilyl)oxy]indene                     | 1.1143      | 7.52E-01 |
| 35     | Sphingosine                                       | 1.1126      | 7.57E-01 |
| 36     | Proline                                           | 1.1090      | 5.16E-01 |
| 37     | Lysine                                            | 1.1023      | 6.53E-01 |
| 38     | pro-gly                                           | 1.0952      | 6.75E-01 |
| 39     | Glycine                                           | 1.0915      | 5.90E-01 |
| 40     | Mandelic acid                                     | 1.0871      | 6.47E-01 |
| 41     | Threo-beta-hydroxyaspartic acid                   | 1.0871      | 6.47E-01 |
| 42     | Methyl-L-serine                                   | 1.0861      | 6.52E-01 |
| 43     | Homoserine                                        | 1.0848      | 6.63E-01 |

| Number | Metabolite                                                                                           | Fold change | P value  |
|--------|------------------------------------------------------------------------------------------------------|-------------|----------|
| 44     | 5-Hydroxytryptophan                                                                                  | 1.0830      | 6.70E-01 |
| 45     | Isoleucine                                                                                           | 1.0829      | 8.72E-01 |
| 46     | Glutamic acid                                                                                        | 1.0798      | 7.20E-01 |
| 47     | Phenylalanine                                                                                        | 1.0787      | 6.76E-01 |
| 48     | 12-Crown-4                                                                                           | 1.0714      | 8.19E-01 |
| 49     | 3,5-Diiodo-L-Tyrosine                                                                                | 1.0701      | 7.20E-01 |
| 50     | Ribose                                                                                               | 1.0623      | 7.26E-01 |
| 51     | Asparagine                                                                                           | 1.0610      | 7.33E-01 |
| 52     | Dihydroxyflavan-4-ol                                                                                 | 1.0395      | 8.55E-01 |
| 53     | Serine                                                                                               | 1.0387      | 8.44E-01 |
| 54     | Mannitol                                                                                             | 1.0300      | 8.42E-01 |
| 55     | Erythritol                                                                                           | 1.0271      | 8.59E-01 |
| 56     | Tyrosine                                                                                             | 1.0242      | 8.95E-01 |
| 57     | 2-oxo-Glutaric acid                                                                                  | 1.0185      | 9.27E-01 |
| 58     | Aspartic acid                                                                                        | 1.0179      | 9.28E-01 |
| 59     | Glyceric acid                                                                                        | 1.0157      | 9.44E-01 |
| 60     | Propanoic acid                                                                                       | 1.0157      | 9.44E-01 |
| 61     | Carnosine                                                                                            | 1.0124      | 9.68E-01 |
| 62     | Pipecolic acid                                                                                       | 1.0121      | 9.71E-01 |
| 63     | Pyroglutamic acid                                                                                    | 1.0121      | 9.71E-01 |
| 64     | Threonine                                                                                            | 1.0104      | 9.58E-01 |
| 65     | Butanedioic acid                                                                                     | 1.0033      | 9.89E-01 |
| 66     | Succinic acid                                                                                        | 1.0033      | 9.89E-01 |
| 67     | Oxalic acid                                                                                          | 0.9923      | 9.71E-01 |
| 68     | Oxamic acid                                                                                          | 0.9913      | 9.68E-01 |
| 69     | Acetylcholine chloride                                                                               | 0.9863      | 9.56E-01 |
| 70     | Compound_59                                                                                          | 0.9807      | 9.55E-01 |
| 71     | Glycerol                                                                                             | 0.9755      | 9.45E-01 |
| 72     | Urea                                                                                                 | 0.9531      | 8.75E-01 |
| 73     | Adenosine-3'-Monophosphoric acid                                                                     | 0.9467      | 9.34E-01 |
| 74     | 3-Oxalomalate                                                                                        | 0.9328      | 8.02E-01 |
| 75     | Beta-Alanine                                                                                         | 0.9275      | 8.20E-01 |
| 76     | Aminooxyacetic acid                                                                                  | 0.9227      | 7.74E-01 |
| 77     | Glycerol-3-phosphate                                                                                 | 0.9179      | 7.24E-01 |
| 78     | Ornithine                                                                                            | 0.9166      | 7.60E-01 |
| 79     | Adenosine                                                                                            | 0.9131      | 8.89E-01 |
| 80     | Compound_49                                                                                          | 0.8958      | 7.16E-01 |
| 81     | Compound_130                                                                                         | 0.8950      | 7.57E-01 |
| 82     | Pyruvic acid                                                                                         | 0.8921      | 5.99E-01 |
| 83     | Lactic acid                                                                                          | 0.8752      | 5.55E-01 |
| 84     | myo-inositol                                                                                         | 0.8748      | 7.22E-01 |
| 85     | Glycolic acid                                                                                        | 0.8744      | 5.54E-01 |
| 86     | Butanal, 2,3,4-tris[(trimethylsilyl)oxy]-3-<br>[[trimethylsilyl)oxy)methyl]-, O-methyloxime,<br>(S)- | 0.8510      | 6.43E-01 |

| <b>Number</b> | <b>Metabolite</b>                          | <b>Fold change</b> | <b>P value</b> |
|---------------|--------------------------------------------|--------------------|----------------|
| 87            | 1,8-Diaminooctane                          | 0.8224             | 4.22E-01       |
| 88            | 5-Hydroxy-DL-lysine hydrochloride          | 0.8217             | 4.21E-01       |
| 89            | Norleucine                                 | 0.8110             | 6.09E-01       |
| 90            | Compound_119                               | 0.7892             | 5.74E-01       |
| 91            | 2,3,4-Trihydroxybutyric acid               | 0.7600             | 3.60E-01       |
| 92            | Methionine                                 | 0.7302             | 2.40E-01       |
| 93            | 2,2-Dimethylsuccinic acid                  | 0.5954             | 1.18E-01       |
| 94            | 4-[bis(trimethylsilyl)amino]-butanoic acid | 0.5954             | 1.18E-01       |
| 95            | Propanedioic acid                          | 0.5954             | 1.18E-01       |
| 96            | Cysteine sulfate                           | 0.5895             | 1.42E-01       |
| 97            | Glutamine                                  | 0.5694             | 2.23E-01       |
| 98            | Uracil                                     | 0.4002             | 4.64E-02       |
| 99            | Cadaverine                                 | 0.3771             | 2.40E-02       |
| 100           | Benzoic acid                               | 0.3486             | 2.82E-01       |
| 101           | Allo-inositol                              | 0.3285             | 7.79E-02       |
| 102           | Lithocholic acid                           | 0.2892             | 1.07E-01       |
| 103           | Arabinose                                  | 0.2140             | 2.13E-02       |
| 104           | Glucose                                    | 0.1568             | 1.99E-04       |

**Table S2. Identified metabolites in *S. enterica*-spiked beef samples**

| Number | Metabolite                                                                  | Fold change | P value  |
|--------|-----------------------------------------------------------------------------|-------------|----------|
| 1      | Trehalose                                                                   | 51.824      | 3.10E-05 |
| 2      | Nonanoic acid                                                               | 29.659      | 7.34E-05 |
| 3      | Compound_63                                                                 | 20.253      | 1.96E-03 |
| 4      | Compound_25                                                                 | 12.114      | 1.39E-04 |
| 5      | Glucose                                                                     | 10.213      | 1.92E-04 |
| 6      | Leucine                                                                     | 10.081      | 7.48E-02 |
| 7      | Homocysteine                                                                | 7.0323      | 2.43E-04 |
| 8      | 2'-Deoxyuridine                                                             | 7.0078      | 2.45E-04 |
| 9      | 3-Butyn-1-ol                                                                | 7.0078      | 2.45E-04 |
| 10     | 3-(trimethylsilyl)-1-(tert-butyl dimethylsiloxy)-4-pentene                  | 6.9646      | 9.56E-03 |
| 11     | Compound_16                                                                 | 6.6297      | 2.89E-03 |
| 12     | cis-1-methyl-2-trimethylsilylmethylcyclo-hexan-1-ol                         | 4.7651      | 5.59E-02 |
| 13     | 2,6-Dihydroxybenzoic acid                                                   | 4.2723      | 2.61E-01 |
| 14     | Propanoic acid, 2-methyl-2,3-bis[(trimethylsilyloxy)-, trimethylsilyl ester | 3.8048      | 6.77E-04 |
| 15     | Tris-[[tert-butyl dimethylsilyloxy]cyclohex-2-en-1-one                      | 3.5022      | 8.06E-04 |
| 16     | Glycerol                                                                    | 2.947       | 1.75E-03 |
| 17     | Compound_106                                                                | 2.7061      | 1.01E-01 |
| 18     | Cysteine sulfate                                                            | 2.5196      | 1.07E-02 |
| 19     | Nonanoic acid                                                               | 2.4302      | 9.48E-02 |
| 20     | Propanoic acid                                                              | 2.3828      | 4.20E-02 |
| 21     | Ribose                                                                      | 2.2821      | 3.01E-03 |
| 22     | N,O-Bis-(trimethylsilyl)-2-pyrrolidone carboxylic acid                      | 2.2734      | 4.10E-02 |
| 23     | N-Carbamyl-L-Glutamic acid                                                  | 2.2731      | 4.09E-02 |
| 24     | Fumaric acid                                                                | 2.2645      | 4.06E-02 |
| 25     | Lyxosylamine                                                                | 1.8449      | 1.30E-01 |
| 26     | Compound_96                                                                 | 1.6994      | 5.71E-02 |
| 27     | Compound_83                                                                 | 1.5782      | 2.44E-01 |
| 28     | Pentanoic acid                                                              | 1.3467      | 3.60E-01 |
| 29     | Phosphoric acid                                                             | 1.2567      | 2.97E-01 |
| 30     | Compound_102                                                                | 1.1828      | 6.84E-01 |
| 31     | Heptadecanoic acid                                                          | 1.171       | 4.70E-01 |
| 32     | Compound_103                                                                | 1.1323      | 7.04E-01 |
| 33     | Glycocholic acid                                                            | 1.1323      | 7.04E-01 |
| 34     | Compound_78                                                                 | 1.1061      | 8.84E-01 |
| 35     | Shikimic acid                                                               | 1.0763      | 8.07E-01 |
| 36     | Linoleic acid                                                               | 1.0756      | 7.10E-01 |
| 37     | Oleic acid                                                                  | 1.0622      | 7.59E-01 |
| 38     | Compound_90                                                                 | 1.0451      | 8.48E-01 |
| 39     | Fructose                                                                    | 1.035       | 8.40E-01 |

| Number | Metabolite                                                                        | Fold change | P value  |
|--------|-----------------------------------------------------------------------------------|-------------|----------|
| 40     | Hexadecanoic acid                                                                 | 1.0297      | 8.80E-01 |
| 41     | Acetyloleanolic acid                                                              | 1.0259      | 9.17E-01 |
| 42     | Compound_105                                                                      | 0.99759     | 9.90E-01 |
| 43     | 1,2-Bis(trimethylsilyoxy)-4-carbomethoxy-5-methyl-1-cyclohexene                   | 0.86553     | 7.11E-01 |
| 44     | Lactic acid                                                                       | 0.85399     | 6.67E-01 |
| 45     | 1-phenyl-1-phenylsulphonyl-1-trimethylsilylethane                                 | 0.84646     | 3.48E-01 |
| 46     | Tetradecanoic acid                                                                | 0.83797     | 3.18E-01 |
| 47     | Propanoic acid, 2-methyl-, propyl ester                                           | 0.81531     | 3.21E-01 |
| 48     | 3-dehydroquinate                                                                  | 0.80499     | 2.71E-01 |
| 49     | 3-Deoxy-arabino-hexonic acid lactone                                              | 0.80406     | 4.13E-01 |
| 50     | Sulfamic acid                                                                     | 0.78639     | 6.79E-01 |
| 51     | Compound_107                                                                      | 0.7837      | 3.07E-01 |
| 52     | 3-methyl-2-butenyl (E)-2-methyl-3-trimethylsiloxy-2-butenolate                    | 0.74932     | 3.30E-01 |
| 53     | 5-((2-methoxyethoxy)methoxy)-7-phenyl-2-(trimethylsilyl)-1-heptene                | 0.71897     | 5.00E-01 |
| 54     | Oxamic acid                                                                       | 0.7175      | 1.58E-01 |
| 55     | Bis[(1,1-dimethylpropyl)(trimethylsilyl)amino]sulfan                              | 0.71004     | 2.50E-01 |
| 56     | Shikimic acid-3-phosphate                                                         | 0.70536     | 3.93E-02 |
| 57     | Cholesterol                                                                       | 0.6841      | 4.33E-02 |
| 58     | Compound_58                                                                       | 0.67263     | 3.97E-01 |
| 59     | Pyruvic acid                                                                      | 0.64102     | 4.36E-01 |
| 60     | N-Glycolylneuraminic acid                                                         | 0.59139     | 5.41E-03 |
| 61     | 4-Hydroperoxy-5-decanol                                                           | 0.56305     | 2.21E-03 |
| 62     | 2,3-Dimethylsuccinic acid                                                         | 0.56305     | 2.21E-03 |
| 63     | 2,4-Dihydroxybutanoic acid                                                        | 0.55187     | 2.35E-03 |
| 64     | 1-(phenylthio)-1-(trimethylsilyl)-4-pentanone                                     | 0.54994     | 7.52E-02 |
| 65     | alpha-ketoisocaproic acid sodium salt                                             | 0.53027     | 2.76E-02 |
| 66     | 4-Hydroxy-3-methoxy-4-(2-propenyl)-2-[(trimethylsilyl)ethynyl]-2-cyclobuten-1-one | 0.51828     | 2.07E-01 |
| 67     | Compound_104                                                                      | 0.51102     | 1.78E-01 |
| 68     | Sodium phenylpyruvate                                                             | 0.50284     | 4.24E-01 |
| 69     | Dodecanoic acid                                                                   | 0.48022     | 1.13E-02 |
| 70     | alpha-D-Glucose-1-phosphate, dipotassium salt dihydrate                           | 0.4704      | 5.60E-04 |
| 71     | Allo-inositol                                                                     | 0.45668     | 5.64E-04 |
| 72     | Uracil                                                                            | 0.39535     | 5.31E-04 |
| 73     | Compound_64                                                                       | 0.35215     | 4.51E-05 |
| 74     | Sarcosine                                                                         | 0.32171     | 1.46E-02 |
| 75     | Phenyllactic acid                                                                 | 0.30173     | 9.35E-03 |
| 76     | 2-phenylsulphonyl-2-trimethylsilylpropane                                         | 0.27071     | 6.64E-03 |
| 77     | Proline                                                                           | 0.26903     | 4.28E-05 |
| 78     | Nicotinic acid                                                                    | 0.2429      | 2.92E-07 |



| <b>Number</b> | <b>Metabolite</b>                                 | <b>Fold change</b> | <b>P value</b> |
|---------------|---------------------------------------------------|--------------------|----------------|
| 79            | alpha-keto-gamma-methiolbutyric acid sodium salt  | 0.24012            | 6.24E-04       |
| 80            | Hexanoic acid                                     | 0.23206            | 3.94E-06       |
| 81            | 2-Butenedioic acid                                | 0.23012            | 2.09E-05       |
| 82            | Mannose                                           | 0.21621            | 2.46E-04       |
| 83            | Compound_95                                       | 0.18883            | 6.30E-03       |
| 84            | Compound_70                                       | 0.16425            | 1.25E-04       |
| 85            | Compound_35                                       | 0.15923            | 2.23E-03       |
| 86            | Propanoic acid, 3-(trimethylsilyl)-, methyl ester | 0.15               | 1.88E-03       |
| 87            | Glycine                                           | 0.14792            | 6.24E-03       |
| 88            | 2-(methoxyimino)-Butanoic acid                    | 0.14694            | 2.55E-05       |
| 89            | Norleucine                                        | 0.14239            | 1.58E-02       |
| 90            | Butanedioic acid                                  | 0.12495            | 3.03E-03       |
| 91            | Valine                                            | 0.11585            | 2.88E-03       |
| 92            | Succinic acid                                     | 0.035714           | 8.05E-08       |

**Table S3. Identified metabolites in *E. coli* O157:H7-spiked beef samples**

| Number | Metabolite                                                    | Fold change | P value  |
|--------|---------------------------------------------------------------|-------------|----------|
| 1      | Glucose                                                       | 97.582      | 5.55E-03 |
| 2      | Compound_49                                                   | 38.817      | 1.76E-05 |
| 3      | Compound_70                                                   | 32.111      | 1.52E-04 |
| 4      | Compound_63                                                   | 21.702      | 5.07E-07 |
| 5      | 5-Hydroxy-DL-lysine hydrochloride                             | 6.4111      | 1.08E-09 |
| 6      | Tryptophan                                                    | 5.4774      | 1.11E-03 |
| 7      | Compound_102                                                  | 3.6291      | 7.49E-10 |
| 8      | Compound_84                                                   | 3.0184      | 1.45E-02 |
| 9      | Putrescine                                                    | 2.5557      | 1.13E-06 |
| 10     | Compound_65                                                   | 2.5218      | 8.85E-02 |
| 11     | N-acetyl-D-galactosamine                                      | 2.3746      | 3.62E-04 |
| 12     | Cellobiose                                                    | 1.9605      | 2.55E-02 |
| 13     | Lysine                                                        | 1.5067      | 2.39E-05 |
| 14     | Succinic acid                                                 | 1.4641      | 4.00E-01 |
| 15     | Lyxosylamine                                                  | 1.4331      | 2.27E-02 |
| 16     | Heptadecanoic acid                                            | 1.4065      | 3.17E-03 |
| 17     | Glucose-6-phosphate                                           | 1.3941      | 2.37E-01 |
| 18     | Uracil                                                        | 1.0352      | 6.89E-01 |
| 19     | Compound_118                                                  | 0.93603     | 8.36E-01 |
| 20     | Glycerol-3-phosphate                                          | 0.92668     | 4.82E-01 |
| 21     | Leucylglycylglycine                                           | 0.92666     | 3.59E-01 |
| 22     | Dihydrouracil                                                 | 0.86871     | 1.07E-01 |
| 23     | Compound_48                                                   | 0.84792     | 4.19E-02 |
| 24     | $\gamma$ -Amino-n-Butyric Acid                                | 0.83668     | 6.48E-01 |
| 25     | Compound_17                                                   | 0.79851     | 7.66E-01 |
| 26     | 2-amino-2-methyl-1,3-propanediol                              | 0.75401     | 1.66E-03 |
| 27     | Fructose                                                      | 0.69442     | 6.02E-01 |
| 28     | Xylose                                                        | 0.68587     | 5.93E-01 |
| 29     | Xanthine                                                      | 0.65271     | 1.58E-03 |
| 30     | Glutamic acid                                                 | 0.64628     | 4.61E-04 |
| 31     | Tyrosine                                                      | 0.63303     | 5.62E-04 |
| 32     | Pyroglutamic acid                                             | 0.5816      | 3.89E-06 |
| 33     | Maleamic acid                                                 | 0.56429     | 2.43E-02 |
| 34     | Proline                                                       | 0.55975     | 1.31E-04 |
| 35     | Isoleucine                                                    | 0.53954     | 4.67E-06 |
| 36     | Valine                                                        | 0.50599     | 2.70E-04 |
| 37     | Compound_60                                                   | 0.49479     | 5.33E-03 |
| 38     | 3-(Diethoxymethyl)-1,5-bis(trimethylsilyl)-1,4-pentadiyn-3-ol | 0.48271     | 1.59E-04 |
| 39     | Leucine                                                       | 0.4763      | 1.90E-04 |
| 40     | Phosphoric acid                                               | 0.47628     | 7.21E-07 |
| 41     | Glycerol                                                      | 0.47627     | 7.20E-07 |
| 42     | Idose                                                         | 0.4691      | 2.20E-05 |
| 43     | Sarcosine                                                     | 0.46836     | 2.82E-04 |

| <b>Number</b> | <b>Metabolite</b>               | <b>Fold change</b> | <b>P value</b> |
|---------------|---------------------------------|--------------------|----------------|
| 44            | Epicatechin                     | 0.46637            | 4.01E-07       |
| 45            | Compound_113                    | 0.46058            | 4.42E-07       |
| 46            | Propanoic acid                  | 0.45397            | 1.69E-02       |
| 47            | 2,4-dihydroxybutanoic acid      | 0.45178            | 2.59E-06       |
| 48            | Phenylalanine                   | 0.44825            | 3.76E-02       |
| 49            | Hexadecanoic acid               | 0.44705            | 3.81E-09       |
| 50            | 3-Oxalomalate                   | 0.44548            | 7.46E-06       |
| 51            | Threonine                       | 0.44505            | 3.86E-07       |
| 52            | Compound_19                     | 0.43855            | 5.62E-04       |
| 53            | Serine                          | 0.43594            | 1.02E-03       |
| 54            | Hexanoic acid                   | 0.43078            | 1.73E-04       |
| 55            | Compound_97                     | 0.4267             | 4.16E-07       |
| 56            | Compound_67                     | 0.42251            | 5.12E-07       |
| 57            | Compound_21                     | 0.42249            | 1.16E-07       |
| 58            | Myo-inositol                    | 0.42125            | 6.83E-06       |
| 59            | Compound_111                    | 0.41502            | 9.25E-06       |
| 60            | 6-(trimethylsilyl)-5-hexyn-1-ol | 0.41317            | 5.83E-06       |
| 61            | Pipecolic acid                  | 0.40543            | 1.53E-07       |
| 62            | Lactic acid                     | 0.40326            | 6.35E-05       |
| 63            | Histidine                       | 0.39557            | 1.48E-05       |
| 64            | Methionine                      | 0.38783            | 8.06E-07       |
| 65            | Norleucine                      | 0.38171            | 7.93E-02       |
| 66            | Oxalic acid                     | 0.37773            | 3.96E-06       |
| 67            | Homoserine                      | 0.37329            | 1.47E-05       |
| 68            | Sucrose                         | 0.37222            | 1.06E-07       |
| 69            | Urea                            | 0.36679            | 3.78E-07       |
| 70            | Compound_106                    | 0.3585             | 3.59E-05       |
| 71            | Ornithine                       | 0.35254            | 8.73E-06       |
| 72            | Compound_120                    | 0.34853            | 9.61E-06       |
| 73            | Glycine                         | 0.33993            | 1.38E-07       |
| 74            | Compound_126                    | 0.33938            | 3.56E-05       |
| 75            | pro-gly                         | 0.33901            | 2.05E-06       |
| 76            | Citric acid                     | 0.33802            | 5.43E-07       |
| 77            | Compound_108                    | 0.33693            | 6.23E-07       |
| 78            | Valero-1,5-lactam               | 0.32885            | 2.23E-01       |
| 79            | Compound_122                    | 0.32234            | 1.63E-08       |
| 80            | Compound_100                    | 0.32175            | 1.00E-07       |
| 81            | Alpha-D-methyl-galactoside      | 0.30827            | 2.59E-08       |
| 82            | Sinapyl alcohol                 | 0.30494            | 1.21E-05       |
| 83            | 3-Amino-2-piperidone            | 0.27087            | 5.34E-05       |
| 84            | (2-hydroxyethyl)-beta-Alanine   | 0.26001            | 4.71E-05       |
| 85            | Compound_89                     | 0.2532             | 4.16E-04       |
| 86            | Beta-Alanine                    | 0.22188            | 2.99E-01       |
| 87            | Compound_125                    | 0.21998            | 2.96E-02       |
| 88            | Carnosine                       | 0.21204            | 2.73E-03       |

| <b>Number</b> | <b>Metabolite</b>                    | <b>Fold change</b> | <b>P value</b> |
|---------------|--------------------------------------|--------------------|----------------|
| 89            | 5-Methoxy-Tryptamin                  | 0.20769            | 2.54E-03       |
| 90            | Compound_110                         | 0.20513            | 7.32E-02       |
| 91            | Lumichrome                           | 0.18277            | 1.25E-01       |
| 92            | 2-amino-butyric acid                 | 0.17746            | 5.04E-05       |
| 93            | Triethylamine, 2-(trimethylsiloxy)   | 0.17073            | 3.54E-07       |
| 94            | 3-Deoxy-arabino-hexonic acid lactone | 0.1703             | 9.08E-10       |
| 95            | Compound_61                          | 0.14047            | 1.30E-03       |
| 96            | Methyl-L-Lysine                      | 0.13914            | 2.51E-02       |
| 97            | Asparagine                           | 0.073659           | 4.23E-02       |
| 98            | Tartaric acid                        | 0.070333           | 2.33E-09       |
| 99            | Cadaverine                           | 0.066192           | 3.58E-08       |
| 100           | Uridine                              | 0.055956           | 3.31E-02       |
| 101           | Butanedioic acid                     | 0.034119           | 4.05E-10       |
| 102           | Aspartic acid                        | 0.030877           | 3.74E-10       |
| 103           | Sophorose                            | 0.017878           | 4.13E-07       |
| 104           | 6-Hydroxymelatonin                   | 0.014419           | 1.52E-08       |
